# Supplementary material for: Evaluation of methods for detecting human reads in microbial sequencing datasets
Source: PubMed Central journal article supplement (PMC7478626; doi:10.1099/mgen.0.000393), 2020-06-19

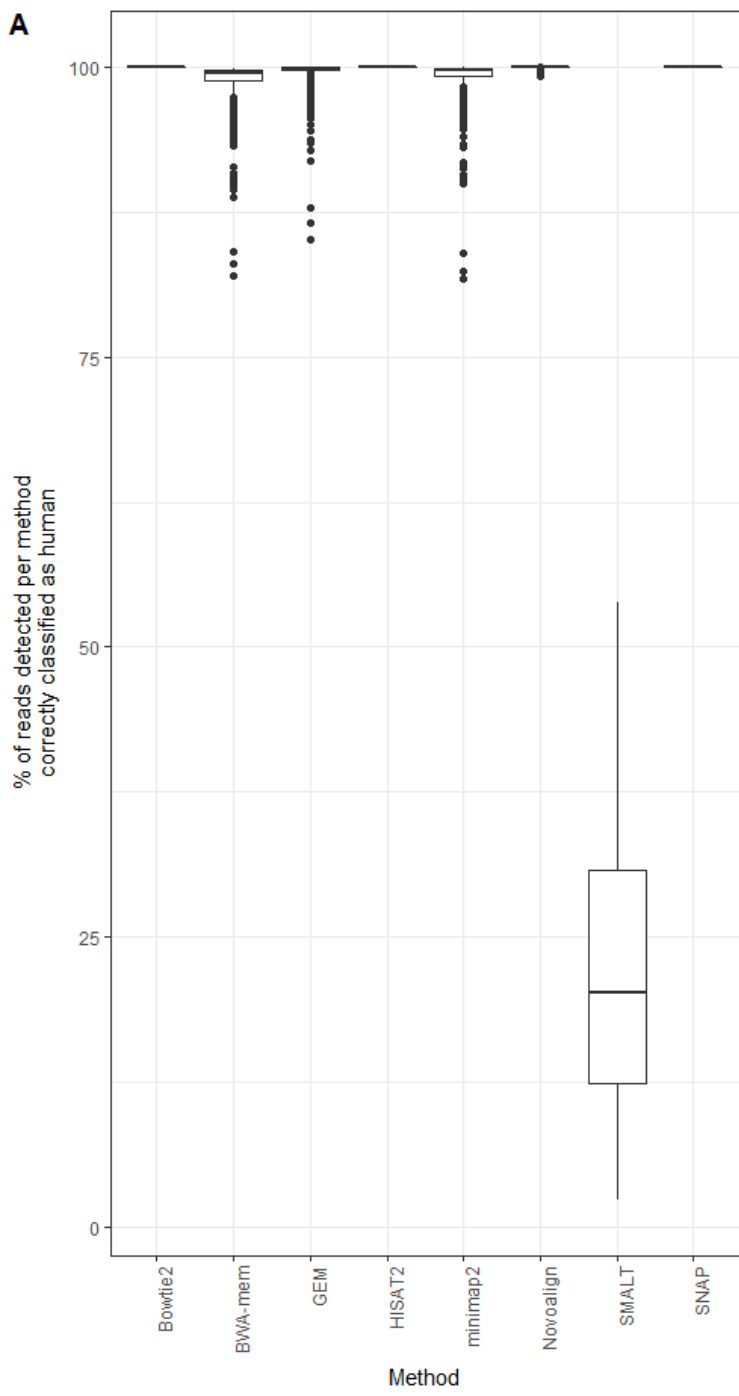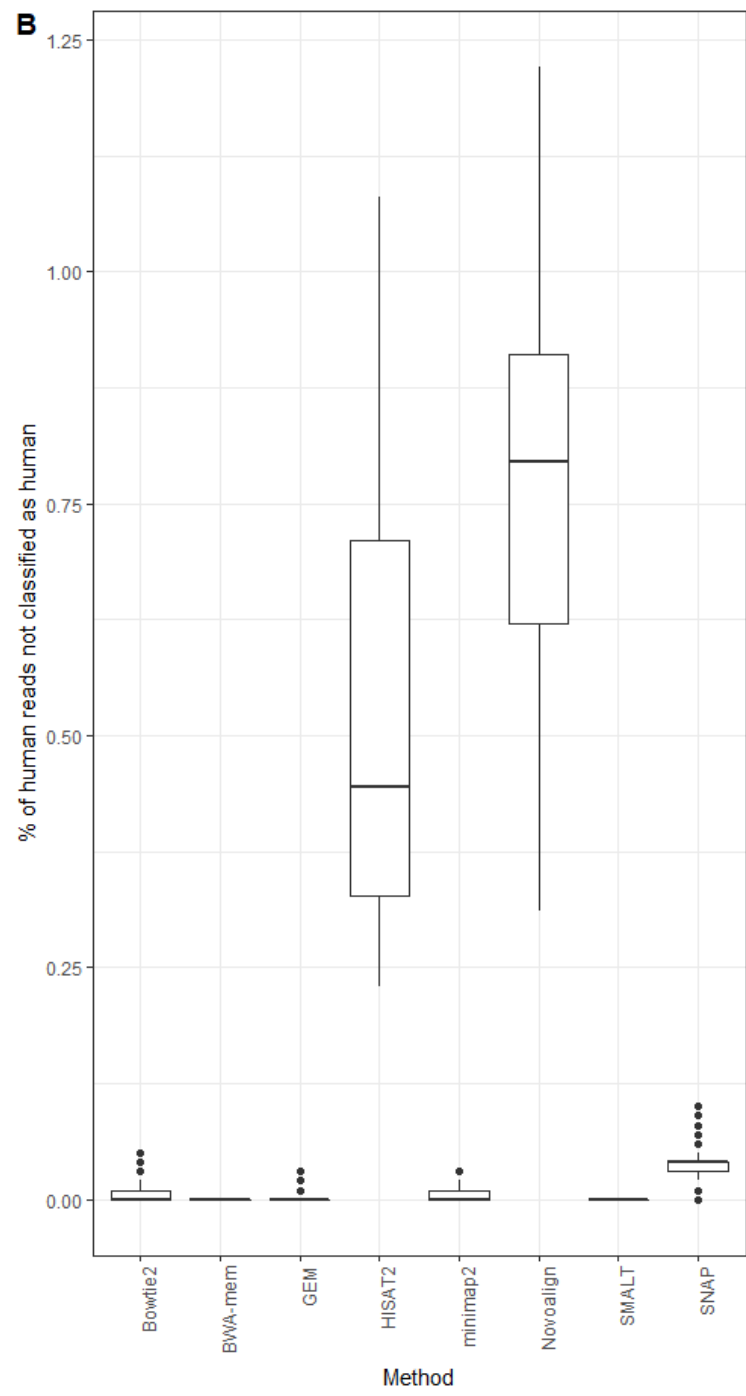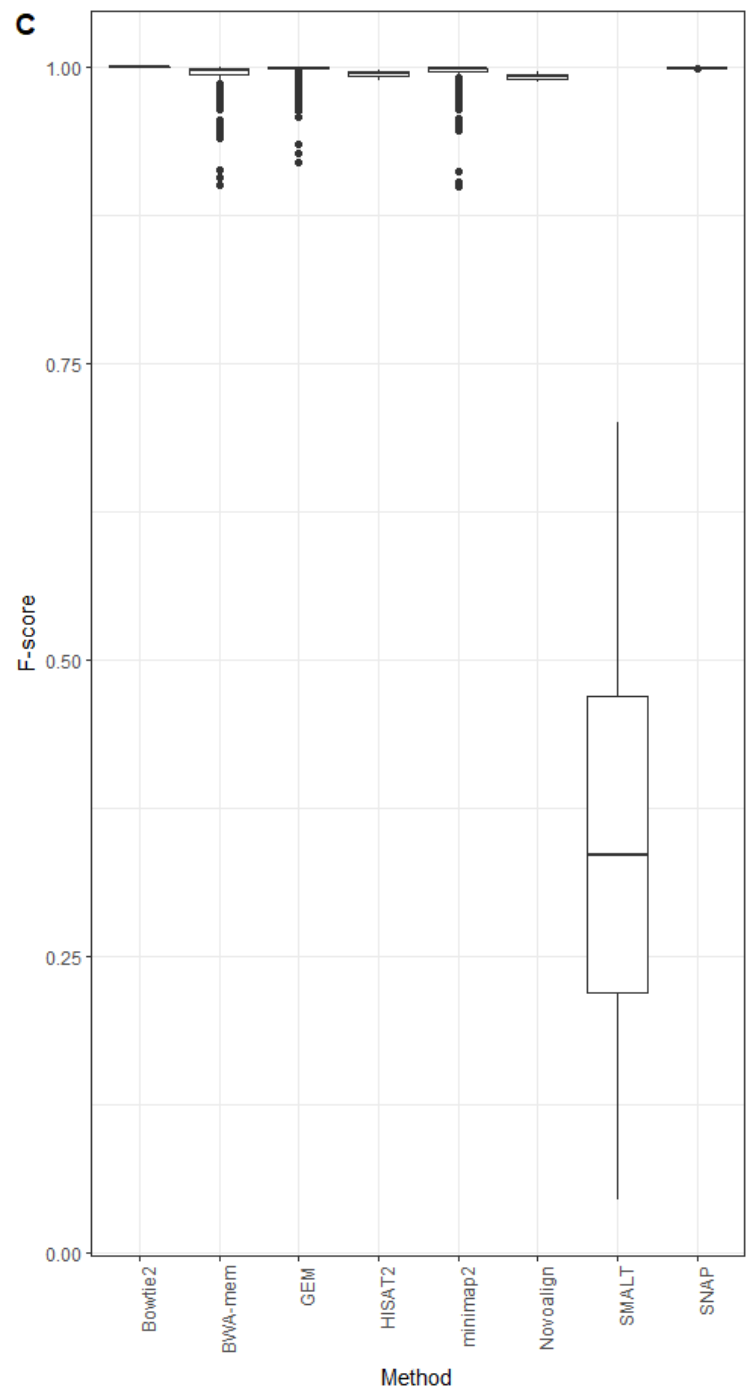

Supplement: mgen-6-393-s001.pdf [file mgen-6-393-s001.pdf]
